# Supplementary material for: Tissue-resident memory CD8+ T cells amplify anti-tumor immunity by triggering antigen spreading through dendritic cells
Source: PubMed Central journal article supplement (PMC6765014; doi:10.1038/s41467-019-12319-x), 2019-09-27
Supplement: 41467_2019_12319_MOESM3_ESM.pdf [file 41467_2019_12319_MOESM3_ESM.pdf]

## Reporting Summary

Nature Research wishes to improve the reproducibility of the work that we publish. This form provides structure for consistency and transparency in reporting. For further information on Nature Research policies, see [Authors & Referees](#) and the [Editorial Policy Checklist](#).

### Statistics

For all statistical analyses, confirm that the following items are present in the figure legend, table legend, main text, or Methods section.

n/a Confirmed

- The exact sample size ( $n$ ) for each experimental group/condition, given as a discrete number and unit of measurement
- A statement on whether measurements were taken from distinct samples or whether the same sample was measured repeatedly
- The statistical test(s) used AND whether they are one- or two-sided  
*Only common tests should be described solely by name; describe more complex techniques in the Methods section.*
- A description of all covariates tested
- A description of any assumptions or corrections, such as tests of normality and adjustment for multiple comparisons
- A full description of the statistical parameters including central tendency (e.g. means) or other basic estimates (e.g. regression coefficient) AND variation (e.g. standard deviation) or associated estimates of uncertainty (e.g. confidence intervals)
- For null hypothesis testing, the test statistic (e.g.  $F$ ,  $t$ ,  $r$ ) with confidence intervals, effect sizes, degrees of freedom and  $P$  value noted  
*Give  $P$  values as exact values whenever suitable.*
- For Bayesian analysis, information on the choice of priors and Markov chain Monte Carlo settings
- For hierarchical and complex designs, identification of the appropriate level for tests and full reporting of outcomes
- Estimates of effect sizes (e.g. Cohen's  $d$ , Pearson's  $r$ ), indicating how they were calculated

*Our web collection on [statistics for biologists](#) contains articles on many of the points above.*

### Software and code

Policy information about [availability of computer code](#)

Data collection

Provide a description of all commercial, open source and custom code used to collect the data in this study, specifying the version used OR state that no software was used.

Data analysis

FlowJo version X.0.7 (Tree Star, Inc.) were used to perform flow cytometry analysis.  
Graphpad Prism 6 software (Graphpad Software Inc.) were used to perform general statistical analysis.

For manuscripts utilizing custom algorithms or software that are central to the research but not yet described in published literature, software must be made available to editors/reviewers. We strongly encourage code deposition in a community repository (e.g. GitHub). See the Nature Research [guidelines for submitting code & software](#) for further information.

### Data

Policy information about [availability of data](#)

All manuscripts must include a [data availability statement](#). This statement should provide the following information, where applicable:

- Accession codes, unique identifiers, or web links for publicly available datasets
- A list of figures that have associated raw data
- A description of any restrictions on data availability

The data that support the findings of this study are available from the corresponding author upon reasonable request.

## Field-specific reporting

Please select the one below that is the best fit for your research. If you are not sure, read the appropriate sections before making your selection.

Life sciences  Behavioural & social sciences  Ecological, evolutionary & environmental sciences

For a reference copy of the document with all sections, see [nature.com/documents/nr-reporting-summary-flat.pdf](https://www.nature.com/documents/nr-reporting-summary-flat.pdf)

## Life sciences study design

All studies must disclose on these points even when the disclosure is negative.

|                 |                                                                                                                                                          |
|-----------------|----------------------------------------------------------------------------------------------------------------------------------------------------------|
| Sample size     | No statistical test was used to pre-determine sample size.                                                                                               |
| Data exclusions | Outliers were identified by Grubb's Test. Outliers were discarded from fig. 1d, 1f, 1g, 2b, 2c, 4c, suppl. fig. 2e and suppl. fig 2f.                    |
| Replication     | The numbers of repeats for experiment was described in each figure legends.                                                                              |
| Randomization   | No pre-established selection criteria for mice were used.<br>No animals were excluded from the analysis and male and female mice were used indistinctly. |
| Blinding        | The investigators were not blinded during experiments.                                                                                                   |

## Reporting for specific materials, systems and methods

We require information from authors about some types of materials, experimental systems and methods used in many studies. Here, indicate whether each material, system or method listed is relevant to your study. If you are not sure if a list item applies to your research, read the appropriate section before selecting a response.

### Materials & experimental systems

| n/a                                 | Involved in the study                                           |
|-------------------------------------|-----------------------------------------------------------------|
| <input type="checkbox"/>            | <input checked="" type="checkbox"/> Antibodies                  |
| <input type="checkbox"/>            | <input checked="" type="checkbox"/> Eukaryotic cell lines       |
| <input checked="" type="checkbox"/> | <input type="checkbox"/> Palaeontology                          |
| <input type="checkbox"/>            | <input checked="" type="checkbox"/> Animals and other organisms |
| <input checked="" type="checkbox"/> | <input type="checkbox"/> Human research participants            |
| <input type="checkbox"/>            | <input checked="" type="checkbox"/> Clinical data               |

### Methods

| n/a                                 | Involved in the study                              |
|-------------------------------------|----------------------------------------------------|
| <input checked="" type="checkbox"/> | <input type="checkbox"/> ChIP-seq                  |
| <input type="checkbox"/>            | <input checked="" type="checkbox"/> Flow cytometry |
| <input checked="" type="checkbox"/> | <input type="checkbox"/> MRI-based neuroimaging    |

## Antibodies

Antibodies used

CCR7-PE/Cy7(clone 4B12) 120124 Biolegend  
 CD103-APC (clone 2E7) 121414 Biolegend  
 CD103-PerCP (clone 2E7) 121416 Biolegend  
 CD11b-FITC (clone M1/70) 101206 Biolegend  
 CD11c-PE/Cy7 (clone N418) 117318 Biolegend  
 CD207-PE (clone 4C7) 144204 Biolegend  
 CD24-PerCP-Cy5.5 (clone M1/69) 101824 Biolegend  
 CD3-APC (clone 17A2) 100236 Biolegend  
 CD3-FITC (clone 17A2) 100204 Biolegend  
 CD3-PerCp/Cy5.5 (clone 17A2) 100218 Biolegend  
 CD44-PerCP (clone IM7) 103036 Biolegend  
 CD45.1-FITC (clone A20) 110706 Biolegend  
 CD45.1-PE/Cy7 (clone A20) 110730 Biolegend  
 CD45-PE (clone 30-F11) 103106 Biolegend  
 CD45-PerCP(clone 30-F11) 103130 Biolegend  
 CD69-APC (clone H1.2F3) 104514 Biolegend  
 CD69-APC/Cy7 (clone H1.2F3) 104526 Biolegend  
 CD80-APC (clone 16-10A1) 104714 Biolegend  
 CD80-PE/Cy7 (clone 16-10A1) 104734 Biolegend  
 CD86 Brilliant Violet 421 (clone GL-1) 105032 Biolegend  
 CD8-Brilliant Violet 421 (clone 53-6.7) 100737 Biolegend  
 Granzyme B-APC (clone GB11) GRB05 Invitrogen  
 IFN-γ-APC (clone XMG1.2) 505810 Biolegend  
 IFN-γ-PE (clone XMG1.2) 505808 Biolegend  
 IL-12/23-APC (clone C15.6) 505205 Biolegend

IL-2-PE/Cy7 (clone JES6-5H4) 503832 Biolegend  
 MHCII-APC/Cy7 (clone M5/114.15.2) 107628 Biolegend  
 TNF- $\alpha$ -APC/Cy7 (clone MP6-XT22) 506344 Biolegend  
 XCR1-APC (clone ZET) 148206 Biolegend  
 XCR1-PerCP-Cy5.5 (clone ZET) 148208 Biolegend

## Validation

Antibodies were purchased directly from BioLegend (<https://www.biolegend.com/en-us/reproducibility>) excepting Granzyme B-APC (clone GB11) GRB05 Invitrogen (<https://www.thermofisher.com/antibody/product/Granzyme-B-Antibody-clone-GB11-Monoclonal/GRB05>).

## Eukaryotic cell lines

### Policy information about [cell lines](#)

## Cell line source(s)

B16F10 cells was obtained from American Type Culture Collection.  
 MC38 cells were kindly provided by Dr. Burkhard Becher (University of Zurich, Switzerland) to Dr. Sergio A. Quezada.  
 The transduced cell lines were gendered as described in the materials and methods section.

## Authentication

*Describe the authentication procedures for each cell line used OR declare that none of the cell lines used were authenticated.*

## Mycoplasma contamination

The cell lines were frequently checked for mycoplasma by PCR.

Commonly misidentified lines  
(See [ICLAC](#) register)

None of cell lines belongs to misidentified cell lines.

## Animals and other organisms

### Policy information about [studies involving animals](#); [ARRIVE guidelines](#) recommended for reporting animal research

## Laboratory animals

C57BL/6/J wild-type (CD45.2), B6.Cg-Thy1a/Cy Tg(TcraTcrb)8Rest/J (pmel-1), C57BL/6-Tg(TcraTcrb)1100Mjb/J (OT-I), CBy.SJL(B6)-Ptprca/J (CD45.1), B6.129S2- Cd207 tm3(DTR/GFP)Mal /J (Langerin-DTR) mice were purchased from Jackson Laboratories, kept at the animal facility of Fundación Ciencia & Vida. The mice were maintained at a temperature of 26 ° -28 ° C, in cycles of light and dark of 12 hours, with water and food ad libitum. When starting the experiments the mice were between 8 and 12 weeks old.

## Wild animals

## Field-collected samples

*For laboratory work with field-collected samples, describe all relevant parameters such as housing, maintenance, temperature, photoperiod and end-of-experiment protocol OR state that the study did not involve samples collected from the field.*

## Ethics oversight

Animales were maintained according to the "Guide to Care and Use of Experimental Animals, Canadian Council on Animal Care". This study was carried out in accordance with the recommendations of the "Guidelines for the welfare and use of animals in cancer research, Committee of the National Cancer Research Institute". The protocol was approved by the "Committee of Bioethics and Biosafety" of Fundación Ciencia & Vida.

Note that full information on the approval of the study protocol must also be provided in the manuscript.

## Clinical data

### Policy information about [clinical studies](#)

All manuscripts should comply with the ICMJE [guidelines for publication of clinical research](#) and a completed [CONSORT checklist](#) must be included with all submissions.

## Clinical trial registration

*Provide the trial registration number from ClinicalTrials.gov or an equivalent agency.*

## Study protocol

*Note where the full trial protocol can be accessed OR if not available, explain why.*

## Data collection

Upper quartile normalized RSEM expected RNA transcript counts and clinical data [43] from The Cancer Genome Atlas (TCGA) project were downloaded from the National Cancer Institute GDC PanCanAtlas project website (<https://gdc.cancer.gov/about-data/publications/pancanatlas>) and cutaneous melanoma cases (SKCM) filtered.

## Outcomes

*Describe how you pre-defined primary and secondary outcome measures and how you assessed these measures.*

## Flow Cytometry

### Plots

Confirm that:

- The axis labels state the marker and fluorochrome used (e.g. CD4-FITC).
- The axis scales are clearly visible. Include numbers along axes only for bottom left plot of group (a 'group' is an analysis of identical markers).
- All plots are contour plots with outliers or pseudocolor plots.
- A numerical value for number of cells or percentage (with statistics) is provided.

### Methodology

Sample preparation

All the tissue preparation protocols for flow cytometry were described in the materials and methods section.

Instrument

FACSCanto II cytometer (BD Bioscience)

Software

FlowJo version X.0.7 (Tree Star, Inc.) were used to perform flow cytometry analysis.

Cell population abundance

*Describe the abundance of the relevant cell populations within post-sort fractions, providing details on the purity of the samples and how it was determined.*

Gating strategy

Figures show the gating strategies.

- Tick this box to confirm that a figure exemplifying the gating strategy is provided in the Supplementary Information.
